# Supplementary material for: Utility of Plasmodium falciparum DNA from rapid diagnostic test kits for molecular analysis and whole genome amplification
Source: PubMed Central journal article supplement (PMC7251736; doi:10.1186/s12936-020-03259-9), 2020-05-27
Supplement: 12936_2020_3259_MOESM2_ESM.pdf [file 12936_2020_3259_MOESM2_ESM.pdf]

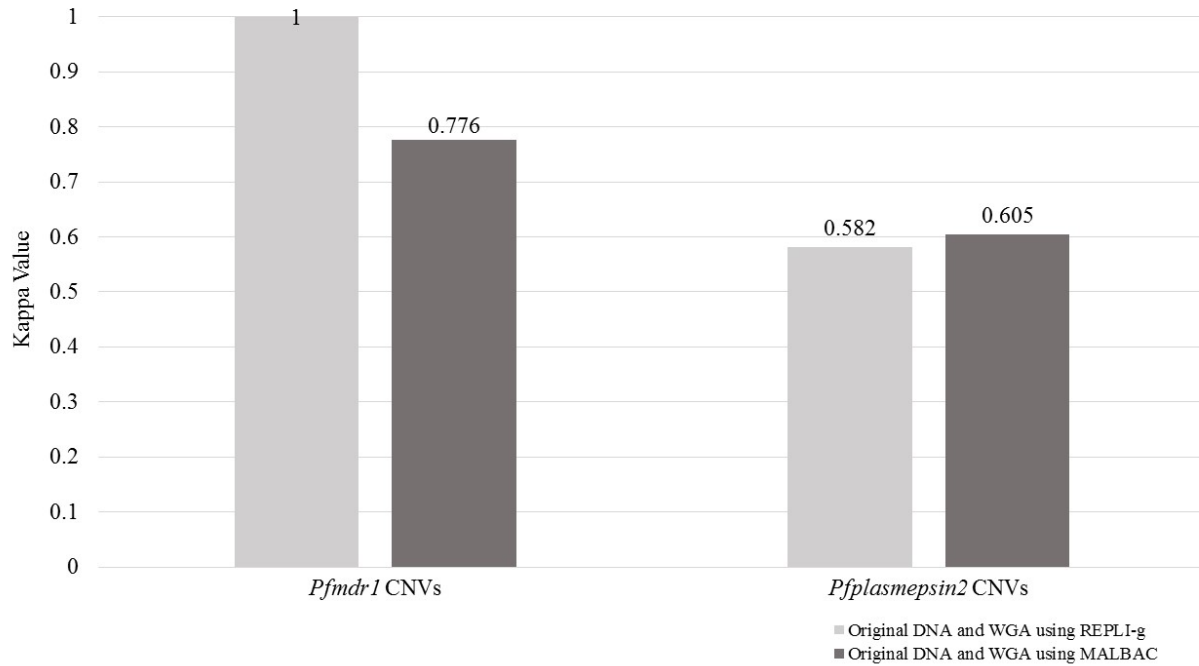

**Additional file 2.** Analytical concordance (based on kappa statistic) of *Pfmdr1* CNVs and *Pfplasmepsin2* CNVs results obtained from original DNA samples extracted from RDT and post-WGA samples using REPLI-g<sup>®</sup> and MALBAC<sup>™</sup> kits.
